# Supplementary material for: Prognosis and recurrence patterns in patients with early stage lung cancer: a multi-state model approach
Source: PubMed Central journal article supplement — Transl Lung Cancer Res. 2022 Jul;11(7):1279–91. doi: 10.21037/tlcr-22-148 (PMC9359942; doi:10.21037/tlcr-22-148), 2022-07
Supplement: tlcr-11-07-1279-supplementary.pdf [file tlcr-11-07-1279-supplementary.pdf]

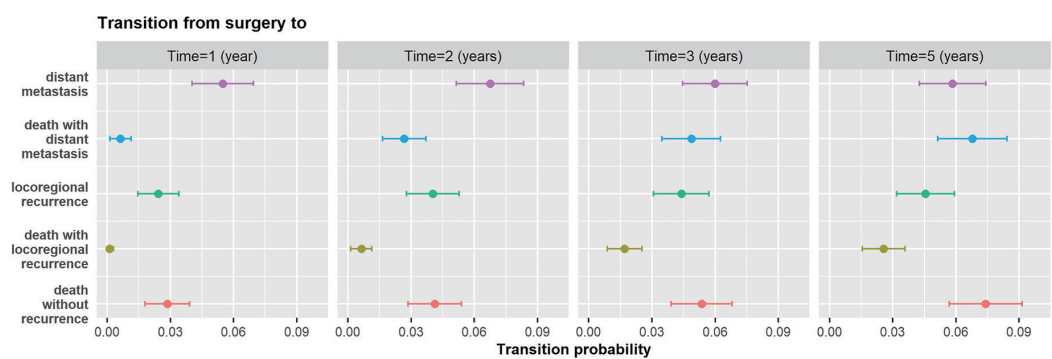

**Figure S1** Forest plots of 95% confidence intervals along with the point estimates of the transition probability for each of the five transitions at 1, 2, 3, and 5 year(s) since surgery.

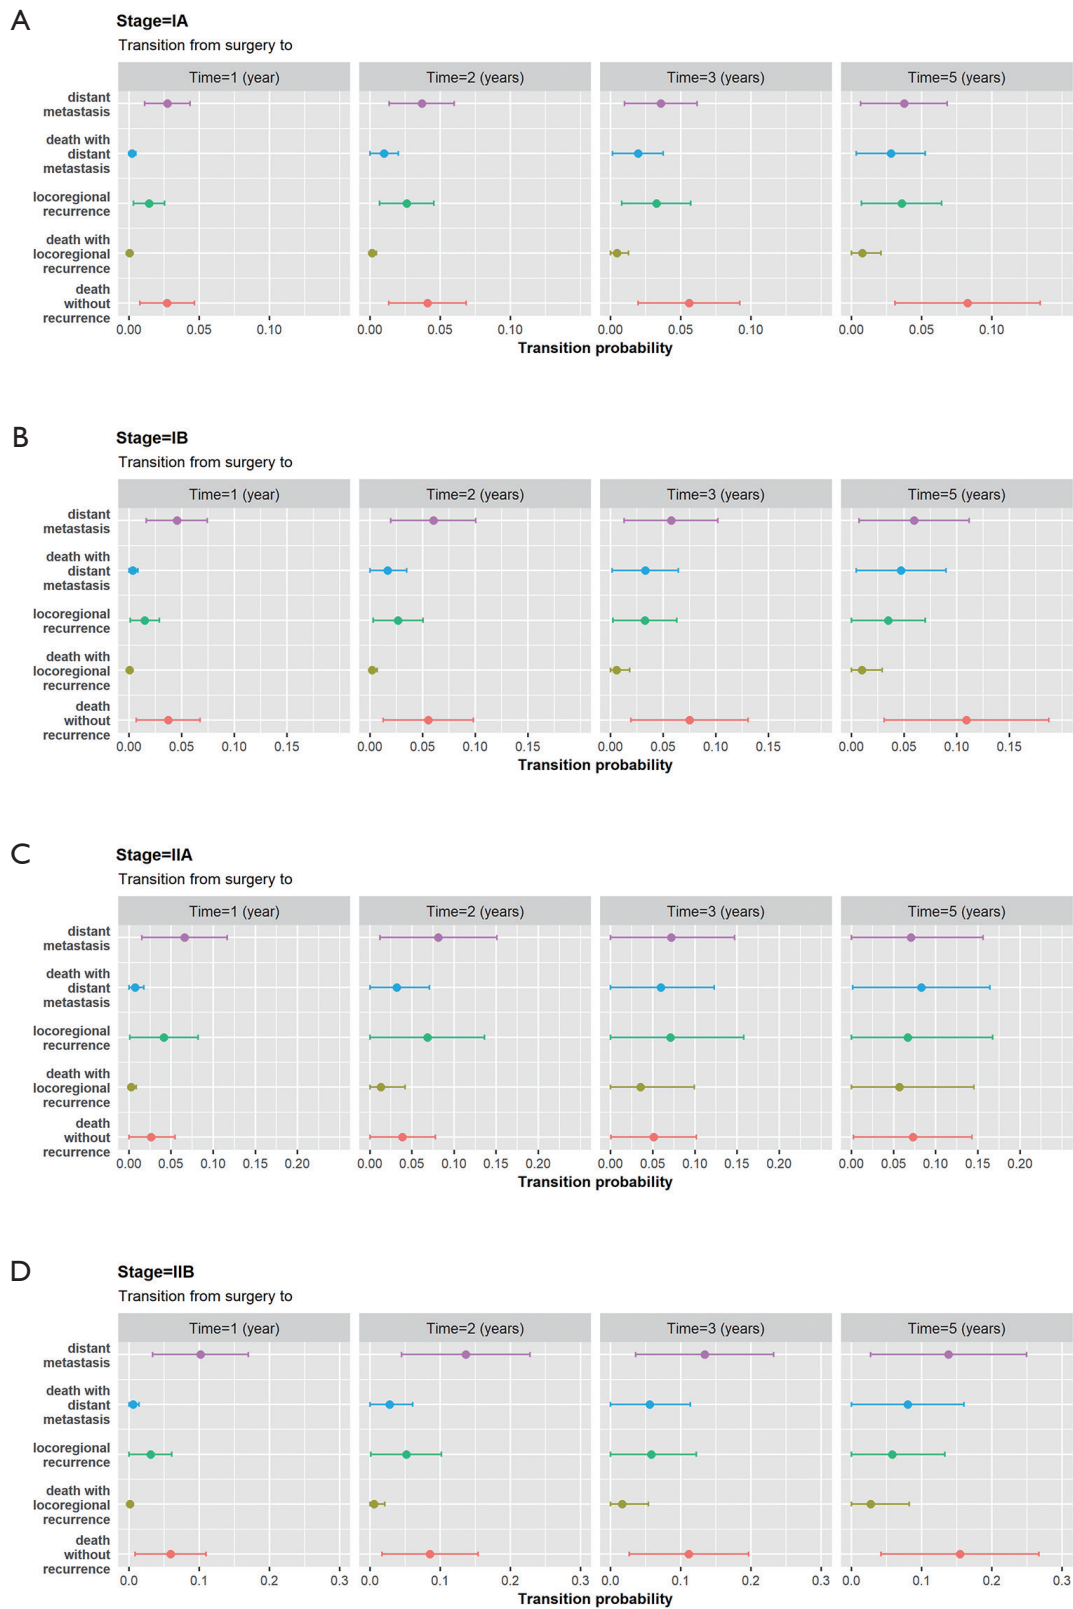

**Figure S2** Forest plots of 95% confidence intervals along with the point estimates of the transition probability for each of the five transitions at 1, 2, 3, and 5 year(s) since surgery according to the pathological TNM stages: (A) for IA, (B) for IB, (C) for IIA, and (D) for IIB.
